# Supplementary material
Source: publisher figshare collection journal article supplement (https://geolsoc.figshare.com/ndownloader/files/18055589)
Supplement: Supplementary file 1 [file 18055589]

| Horizon                            | Reflection                                 | Age                 | Seismic facies atop                 | Seismic facies below                  |
|------------------------------------|--------------------------------------------|---------------------|-------------------------------------|---------------------------------------|
| Seabed                             | Hard, peak                                 | Holocene            |                                     | GDFs                                  |
|                                    | High-amplitude                             |                     |                                     | Low-amplitude                         |
|                                    | Continuous                                 |                     |                                     | Transparent                           |
| Base Last Glaciation               | Hard, peak                                 | Start MIS2          | GDFs                                | Contourites                           |
|                                    | High-amplitude                             |                     | Low-amplitude                       | Low-amplitude                         |
|                                    | Continuous                                 |                     | Transparent                         | Continuous                            |
| Top Tampen MTD                     | Hard, peak                                 | End MIS6            | Contourites                         | MTD                                   |
|                                    | High-amplitude                             |                     | Low-amplitude                       | Moderate-amplitude                    |
|                                    | Discontinuous                              |                     | Continuous                          | Distorted                             |
| Base Tampen MTD                    | Hard, peak                                 | Start MIS6          | MTD                                 | GDFs                                  |
|                                    | Moderate-amplitude                         |                     | Moderate-amplitude                  | Low-amplitude                         |
|                                    | Continuous                                 |                     | Distorted                           | Transparent, occ. continuous          |
| Base MIS8                          | Hard, peak                                 | Start MIS8          | GDFs                                | Contourites                           |
|                                    | High-amplitude                             |                     | Low-amplitude                       | Low-amplitude                         |
|                                    | Continuous                                 |                     | Transparent, occ. continuous        | Continuous                            |
| Top Møre MTD                       | Hard, peak                                 | End MIS10           | Contourites                         | MTD                                   |
|                                    | High-amplitude                             |                     | Low-amplitude                       | Moderate-amplitude                    |
|                                    | Discontinuous                              |                     | Continuous                          | Distorted                             |
| Base Naust                         | Soft, trough                               | 2.7 Ma              | Various                             | Marine deposits                       |
|                                    | High/Low-amplitude                         |                     | MTD, glacimarine, GDFs              | High/Low-amplitude                    |
|                                    | Continuous                                 |                     |                                     | Continuous                            |
| Top Eocene                         | Hard, peak                                 | Top Eocene          | Moderate-amplitude                  | Low-amplitude                         |
|                                    | High-amplitude                             |                     | Continuous to semi-continuous       | Continuous to semi-continuous         |
|                                    | Continuous                                 |                     |                                     |                                       |
| Top Tare (=Top Balder)             | Hard, peak                                 | Early Eocene        | Low-amplitude                       | High/Low-amplitude                    |
|                                    | High-amplitude                             |                     | Continuous to semi-continuous       | Continuous/Semi-transparent           |
|                                    | Continuous                                 |                     |                                     |                                       |
| Top Paleocene                      | Hard, peak                                 | End Paleocene       | High-amplitude                      | High/Low-amplitude                    |
|                                    | High-amplitude                             |                     | Continuous to semi-continuous       | Continuous, faulted, semi-transparent |
|                                    | Partly continuous                          |                     |                                     |                                       |
| Top Basalt                         | Hard, peak                                 | End Paleocene/      | Moderate-amplitude                  | High/Low-amplitude                    |
|                                    | High-amplitude                             | Earliest Eocene     | Continuous, (semi-)transparent      | Continuous, faulted, wavy             |
|                                    | Mostly continuous                          |                     |                                     |                                       |
| Base Basalt                        | Soft, trough                               | End Paleocene/      | High/Low-amplitude                  | High/Low-amplitude                    |
|                                    | Moderate-amplitude                         | Earliest Eocene     | (Semi-)continuous, semi-transparent | Semi-transparent                      |
|                                    | In places continuous, in places calculated |                     |                                     |                                       |
| Top Danian                         | Hard, peak                                 | Top Danian          |                                     |                                       |
|                                    | Moderate-amplitude                         |                     |                                     |                                       |
|                                    | Continuous                                 |                     |                                     |                                       |
| Top Cretaceous                     | Hard, peak                                 | Top Cretaceous      |                                     | Transparent                           |
|                                    | Moderate to high-amplitude                 |                     |                                     |                                       |
|                                    | Continuous                                 |                     |                                     |                                       |
| Top Nise                           | Hard, peak and soft, trough                | Intra-mid-Campanian |                                     | Polygonal faulted                     |
|                                    | High-low amplitude                         |                     |                                     |                                       |
| Top Lysing                         | Mostly soft, trough                        | Near Top Turonian   | Moderate-amplitude                  | Moderate/Low-amplitude                |
|                                    |                                            |                     | Highly faulted                      |                                       |
| Mid-Cenomanian                     | Hard, peak                                 | Mid-Cenomanian      | Moderate-amplitude                  | Semi-coherent/incoherent              |
|                                    |                                            |                     | (Semi-)coherent                     |                                       |
| Mid-Albian                         | Hard, peak                                 | Mid-Albian          | High-amplitude                      | High/Moderate-amplitude               |
|                                    | High-amplitude                             |                     | (Semi-)coherent, (Semi-)continuous  | (Semi-)coherent to incoherent         |
| Base Cretaceous Unconformity (BCU) | Soft, trough                               | Earliest Cretaceous | (Semi-)coherent to incoherent       | Coherent to incoherent                |
|                                    |                                            |                     |                                     | Transparent                           |

Supplementary data item 1. Interpreted horizons within the Atlantic Margins (AM) area.

## Tulipan

Formation Tops  
(VBPR)

A: Base Naust  
B: Opal A/CT  
C: Top Tare  
D: Near Top  
Paleocene  
E: Top Danian  
F: Top  
Cretaceous

Parameters:

Ricker wavelet  
Central frequency: 13 Hz  
Length: 128 ms  
Sample rate: 2 ms  
Time shift: -10.9 ms

Comparison is to  
AMS18-FFT (full fast-  
track) Inline: 14588

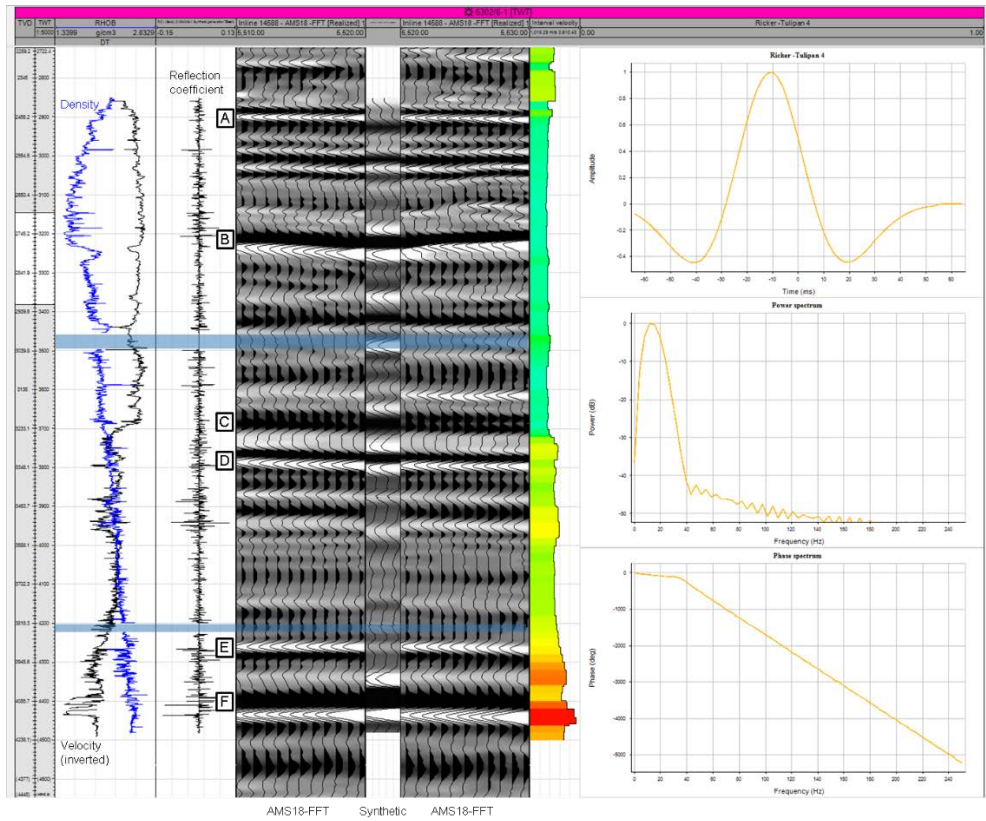

Supplementary data item 2. Borehole synthetic seismogram for the Tulipan 6302/6-1 borehole compared to the AMS fast track processed seismic data.
